# Supplementary material for: Tunable reactivity of silver nanoclusters: a facile route to synthesize a range of bimetallic nanostructures
Source: Royal Society of Chemistry journal article supplement (doi:10.1039/d2nr06350f), 2023-01-01
Supplement: d2nr06350f1.pdf [file d2nr06350f1.pdf]

## Supplementary Information

### Tunable reactivity of silver nanoclusters: Facile route to synthesize a range of bimetallic nanostructures

Amrita Chakraborty,<sup>a</sup> Megha Maria Stanley,<sup>a</sup> Biswajit Mondal,<sup>a</sup> Nonappa,<sup>b</sup> Md Bodiuzzaman,<sup>a</sup> Papri Chakraborty,<sup>a</sup> M. P. Kannan,<sup>a</sup> and Thalappil Pradeep<sup>a,\*</sup>

#### Affiliations:

<sup>a</sup>DST Unit of Nanoscience and Thematic Unit of Excellence, Department of Chemistry, Indian Institute of Technology Madras, Chennai 600036, India.

<sup>b</sup>Faculty of Engineering and Natural Sciences, Tampere University, FI-33101, Tampere, Finland.

#### Table of contents

| SI No.    | Title                                                                         | Page No. |
|-----------|-------------------------------------------------------------------------------|----------|
| Fig. S1   | Detailed characterization of AuNT                                             | 2        |
| Fig. S2   | TEM image of AuNTs dispersed in DMF                                           | 3        |
| Fig. S3   | Effect of the NC concentration on the reaction                                | 3        |
| Figure S4 | Comparative powder XRD of AuNT and AuNT@1                                     | 4        |
| Fig. S5   | TEM EDS analysis of AuNT@2 in water                                           | 4        |
| Fig. S6   | TEM EDS analysis of AuNT@2 in DMF                                             | 4        |
| Fig. S7   | Characterization of reacted 3                                                 | 5        |
| Fig. S8   | Characterization of AuNT@DMBT and AuNT@DMBT@1                                 | 5        |
| Fig. S9   | Characterization of AuNT@pMBA                                                 | 6        |
| Fig. S10  | TEM EDS of AuNT@pMBA@3 nanocomposite and TEM image of the same after 5 months | 6        |
| Video S1  | Tomographic reconstruction of AuNT                                            | Attached |

|          |                                      |          |
|----------|--------------------------------------|----------|
| Video S2 | Tomographic reconstruction of AuNT@1 | Attached |
|----------|--------------------------------------|----------|

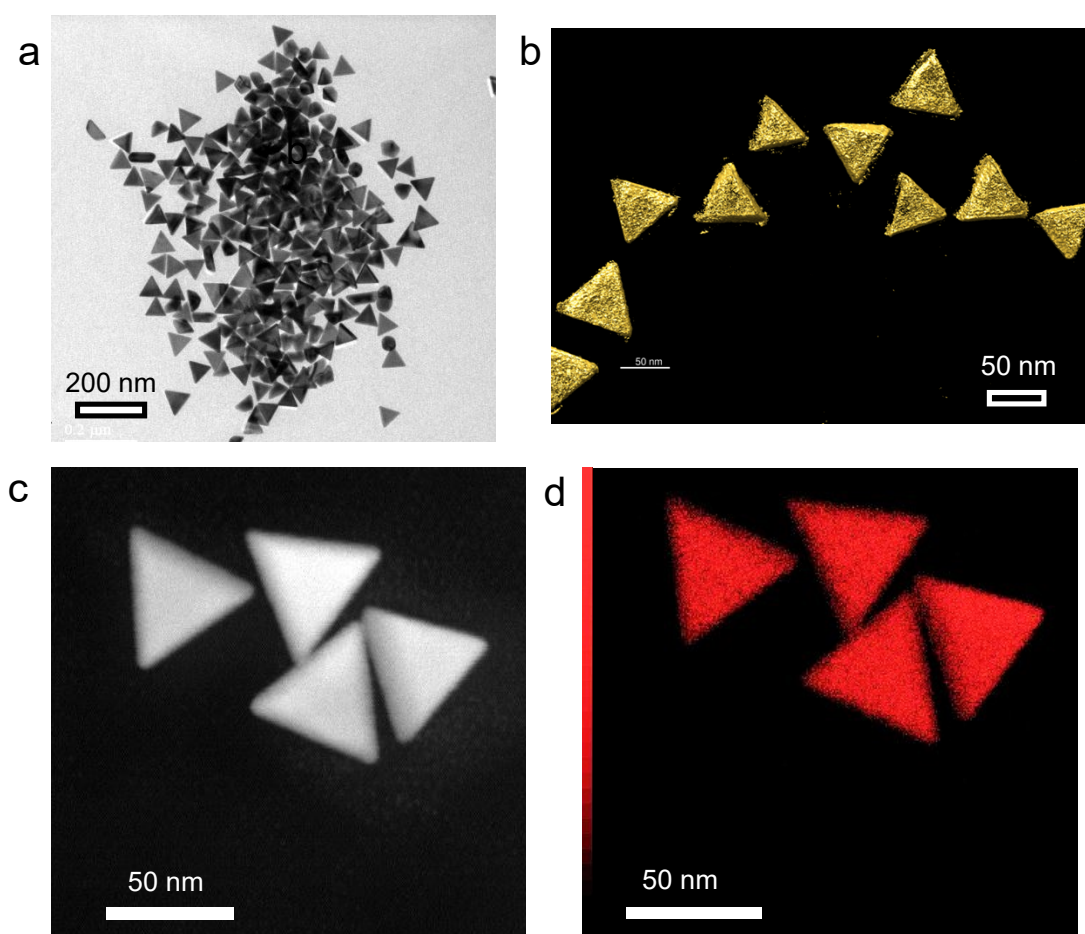

**Fig. S1** Characterization of AuNT: a) TEM image, b) 3D tomographic reconstruction, c) dark-field STEM image, and d) corresponding EDS elemental mapping (Au is shown in red).

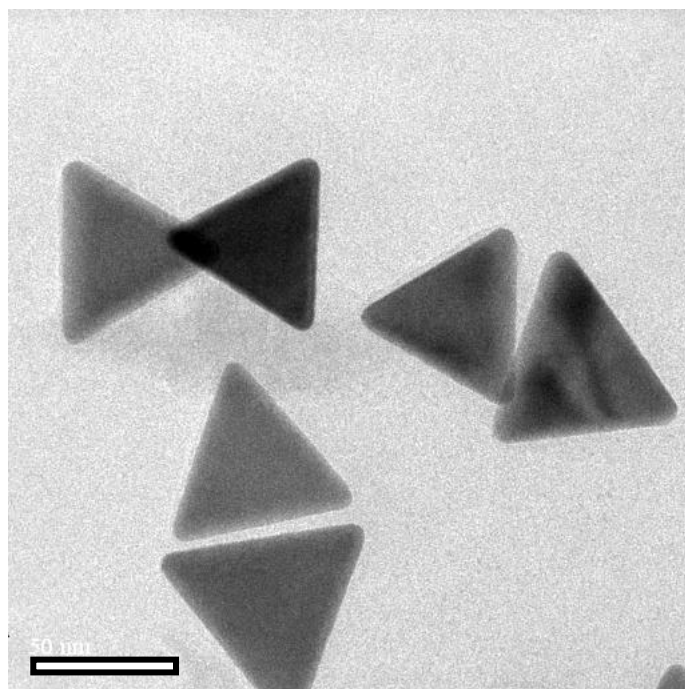

**Fig. S2** TEM image of AuNTs dispersed in DMF after a week. Scale bar 50 nm.

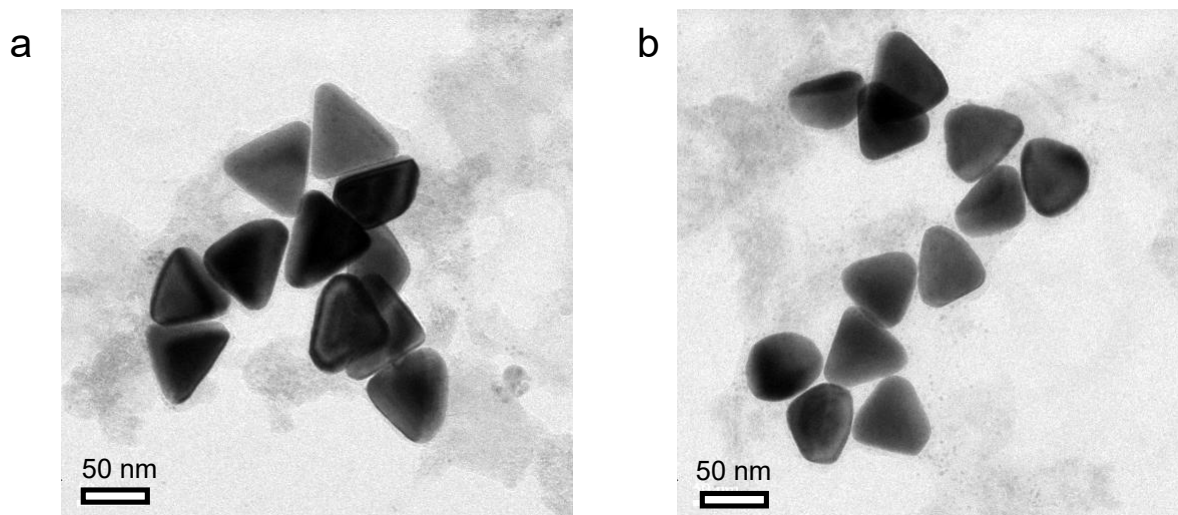

**Fig. S3** TEM image of AuNT@1 upon addition of a) 40  $\mu$ L, and b) 200  $\mu$ L **1** showing minor effect of NC concentration on the product.

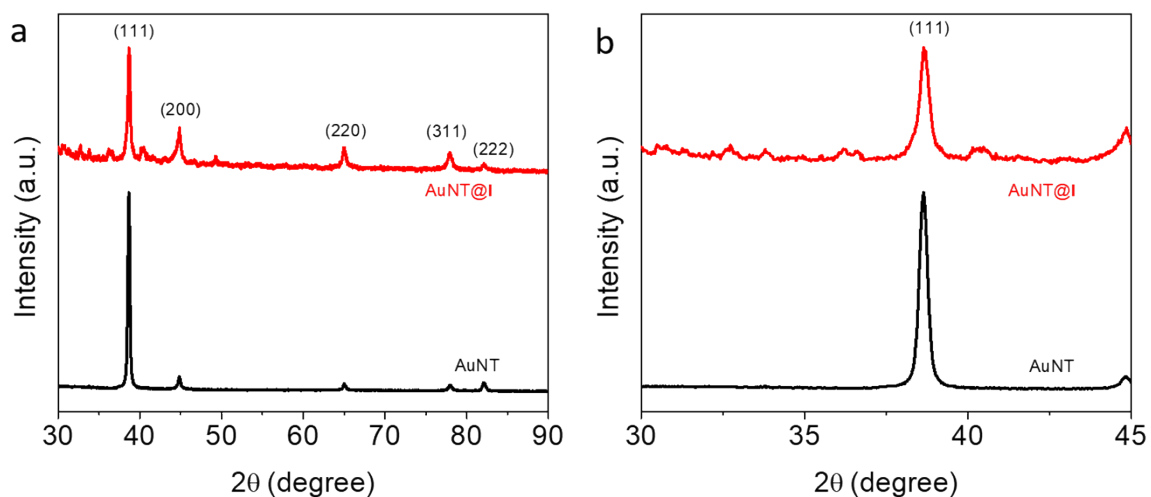

**Fig. S4.** Comparative powder XRD of AuNT and AuNT@1 (a) and magnified view of the peaks corresponding to the (111) lattice plane (b), showing no change in the peak position.

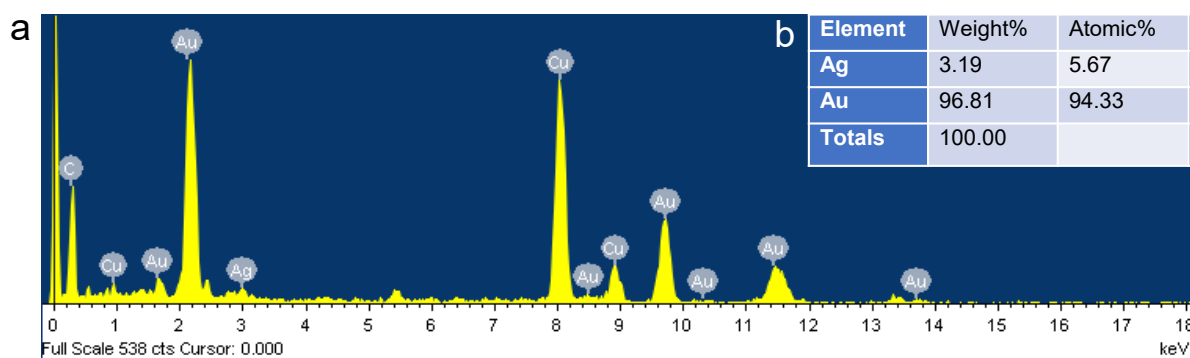

**Fig. S5** TEM EDS analysis of AuNT@2 in water: EDS spectrum (a) and corresponding elemental quantification (b).

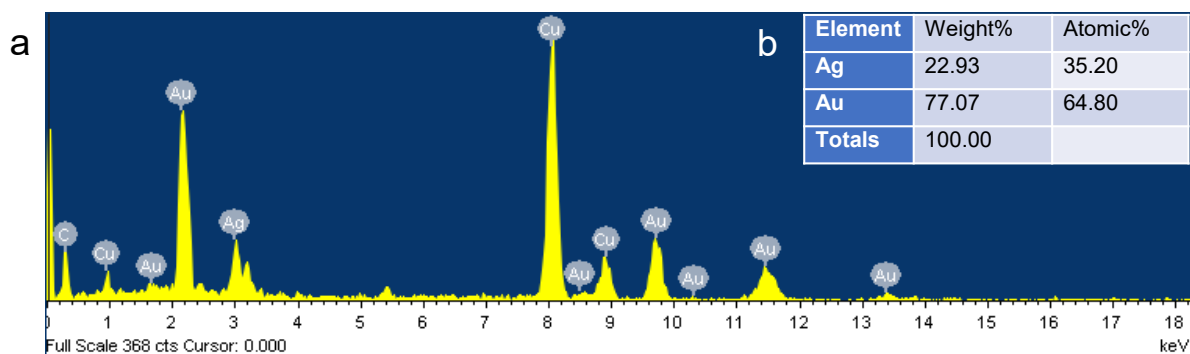

**Fig. S6** TEM EDS analysis of AuNT@2 in DMF: EDS spectrum (a) and corresponding elemental quantification (b).

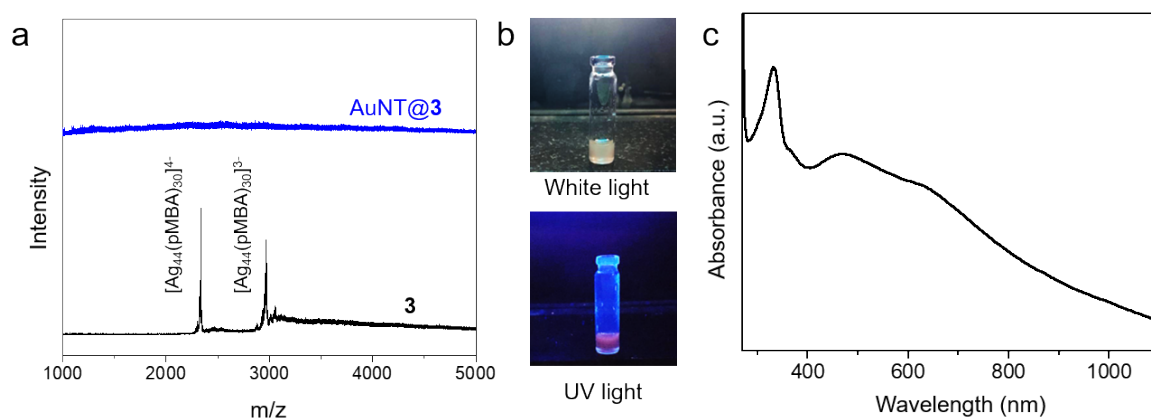

**Fig. S7** Characterization of reacted **3**: (a) ESI MS spectra of parent NC and that reacted with AuNTs showing that the two molecular ion peaks of the NC disappear upon reaction. (b) photograph of the reaction mixture showing luminescent by-product and (c) corresponding UV-vis absorption spectrum.

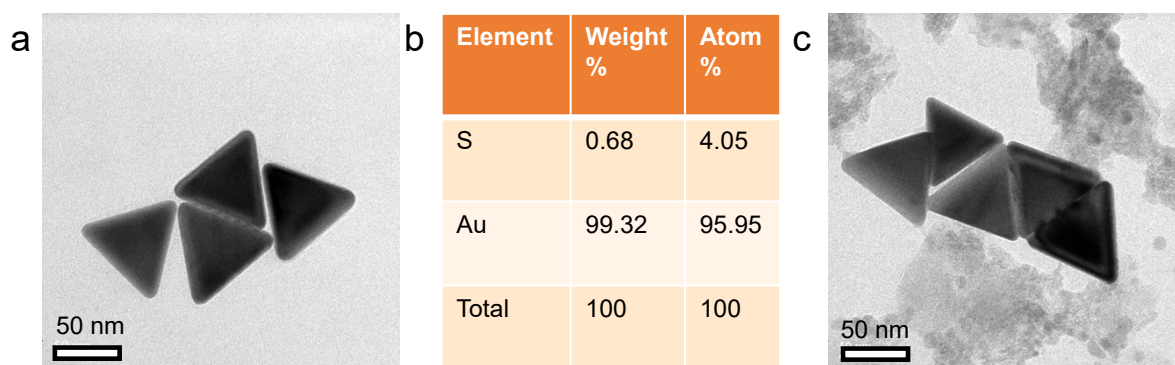

**Fig. S8** Characterization of AuNT@DMBT and AuNT@DMBT@1: (a) TEM image of AuNT@DMBT, (b) TEM EDS elemental analysis of AuNT@DMBT showing the presence of S on the nanoparticles, and (c) TEM image of AuNT@DMBT@1 which shows no morphological changes.

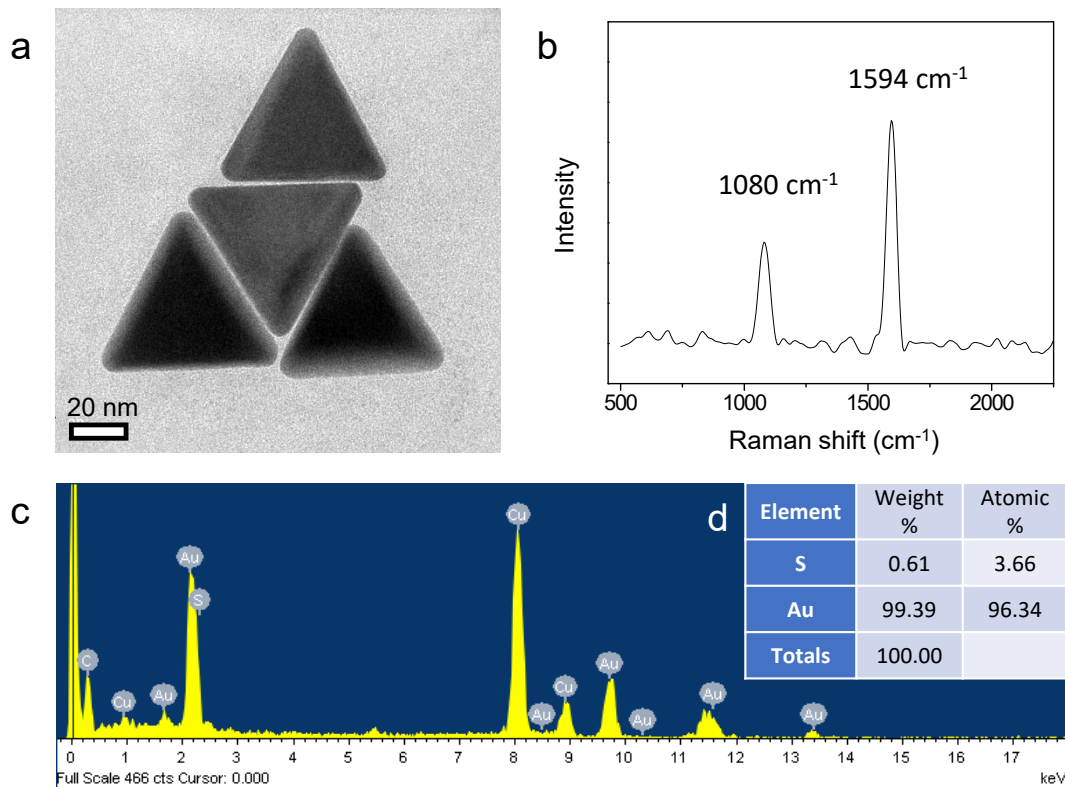

**Fig. S9** Characterization of AuNT@pMBA: (a) TEM image of the particles showing no change in the size and shape as compared to the parent AuNTs. (b) Raman spectrum of AuNT@pMBA showing two peaks at 1080  $\text{cm}^{-1}$  and 1594  $\text{cm}^{-1}$ , the characteristic features of pMBA molecule, (c) TEM EDS spectrum and (d) corresponding elemental quantification showing the traces of S along the particles.

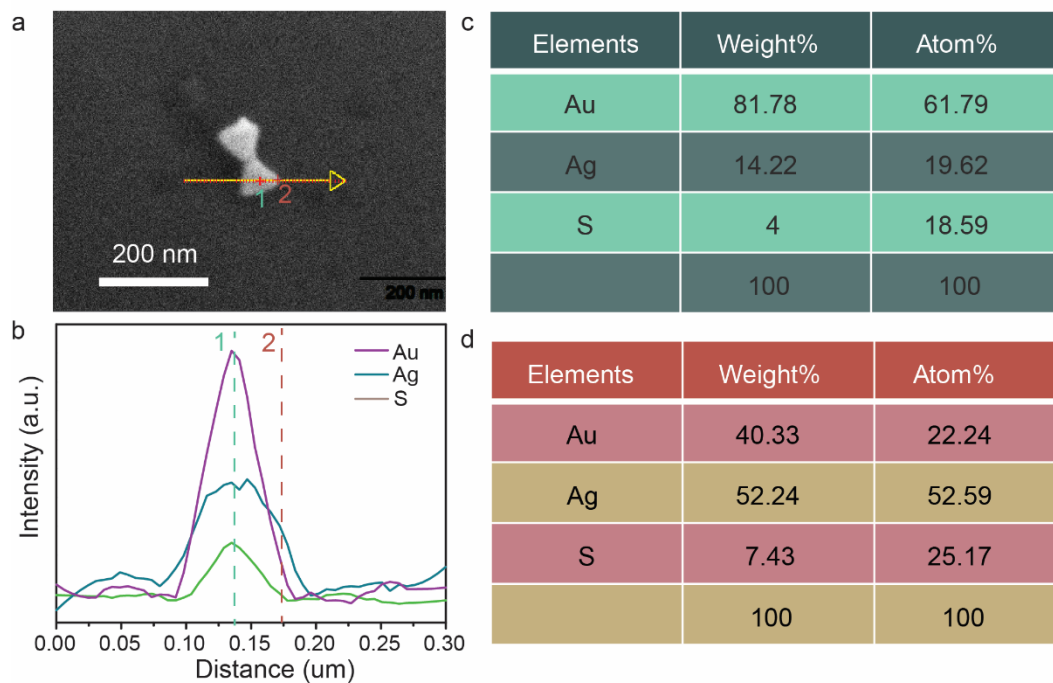

**Fig. S10** (a) FESEM image of AuNT@pMBA@3, (b) EDS line profile drawn along the yellow arrow in Figure (a) showing the distribution of Au, Ag, and S along a particle, (c) elemental quantification at the centre of the particle (position 1) and (d) that at the edge (position 2).

Video S1 and S2 are attached separately.
